# Supplementary material for: Theoretical search for potential candidates as building blocks of hyperhalogens: BS2 and CrO4 molecules
Source: Royal Society of Chemistry journal article supplement (doi:10.1039/c3ra43128b), 2013-01-01

# Theoretical search for potential candidates as building block of hyperhalogens: $\text{BS}_2$ and $\text{CrO}_4$ molecules

## Supplementary Information

Li-Ping Ding,<sup>a</sup> Xiao-Yu Kuang,<sup>a,\*</sup> Peng Shao,<sup>a</sup> Ming-Min Zhong<sup>a</sup>, Ya-Ru Zhao<sup>b</sup>

**Fig. S1** The low-lying isomer structures of neutral and anionic  $(\text{BO}_2)_2$ ,  $(\text{BS}_2)_2$  and  $(\text{CrO}_4)_2$  clusters at B3LYP/6-311+G(3df) level. All the bond lengths are given in Å.

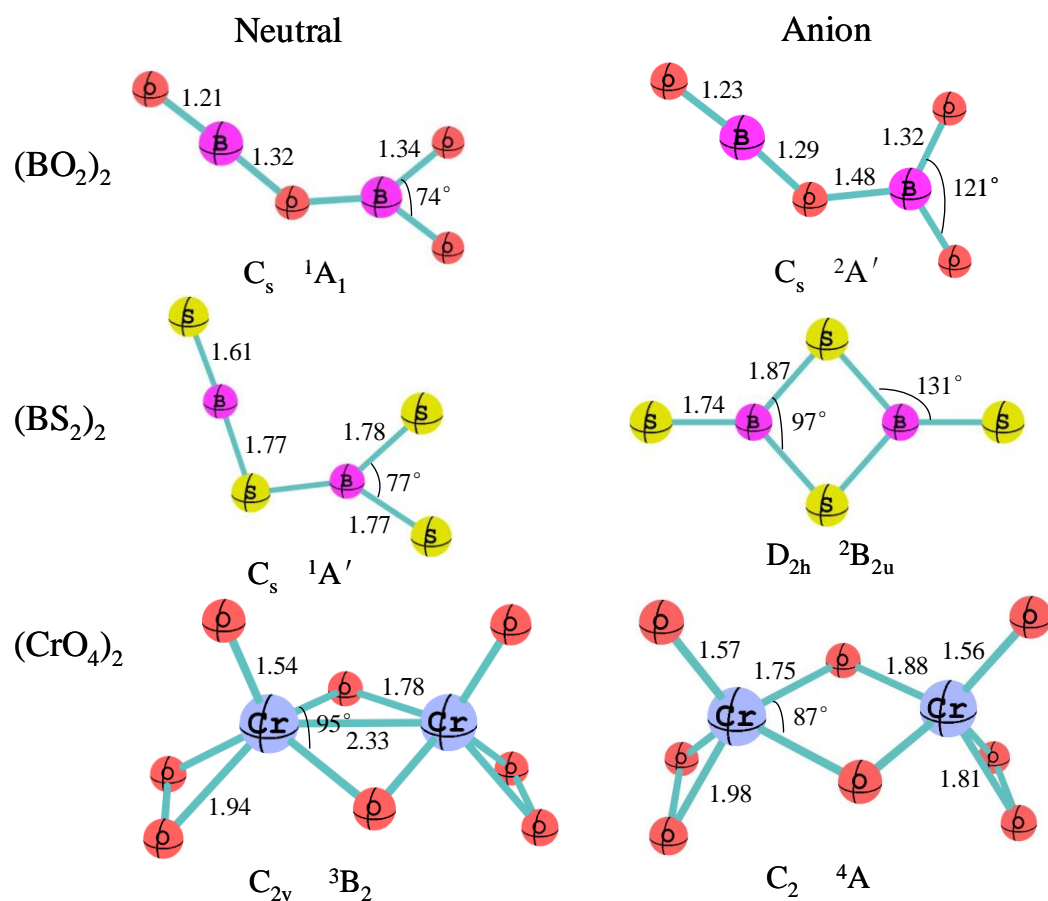

<sup>a</sup> Institute of Atomic and Molecular Physics, Sichuan University, Chengdu 610065, China

<sup>b</sup> Department of Physics and Information Technology, Baoji University of Arts and Sciences, Baoji 721016, China.

\*Correspondence to: Kuang Xiao-Yu, Institute of Atomic and Molecular Physics, Sichuan University, Chengdu 610065, China. Tel./fax: +86 28 85405515.

E-mail address: [scu\\_kuang@163.com](mailto:scu_kuang@163.com) (X-Y Kuang).

**Fig. S2** The low-lying isomer structures of neutral and anionic Au(BO<sub>2</sub>)<sub>2</sub> clusters along with their geometrical parameters. All the bond lengths are given in Å.

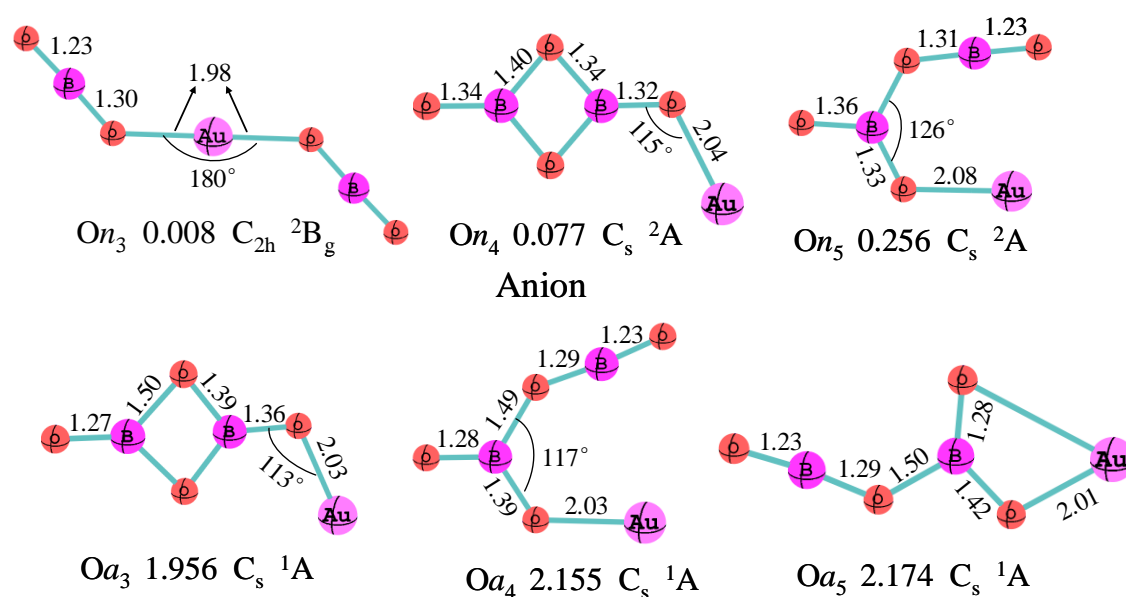

**Fig. S3** The low-lying isomer structures of neutral and anionic Au(BS<sub>2</sub>)<sub>2</sub> clusters along with their geometrical parameters. All the bond lengths are given in Å.

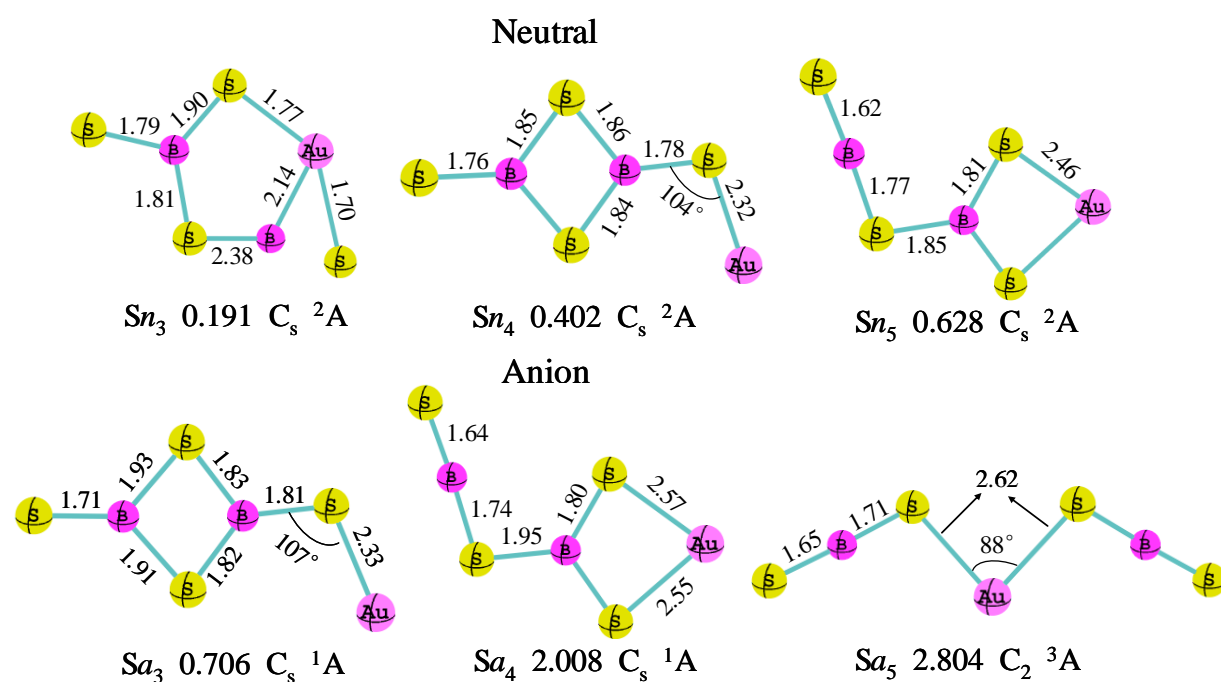

**Fig. S4** The low-lying isomer structures of neutral and anionic  $\text{Au}(\text{CrO}_4)_2$  clusters along with their geometrical parameters. All the bond lengths are given in Å.

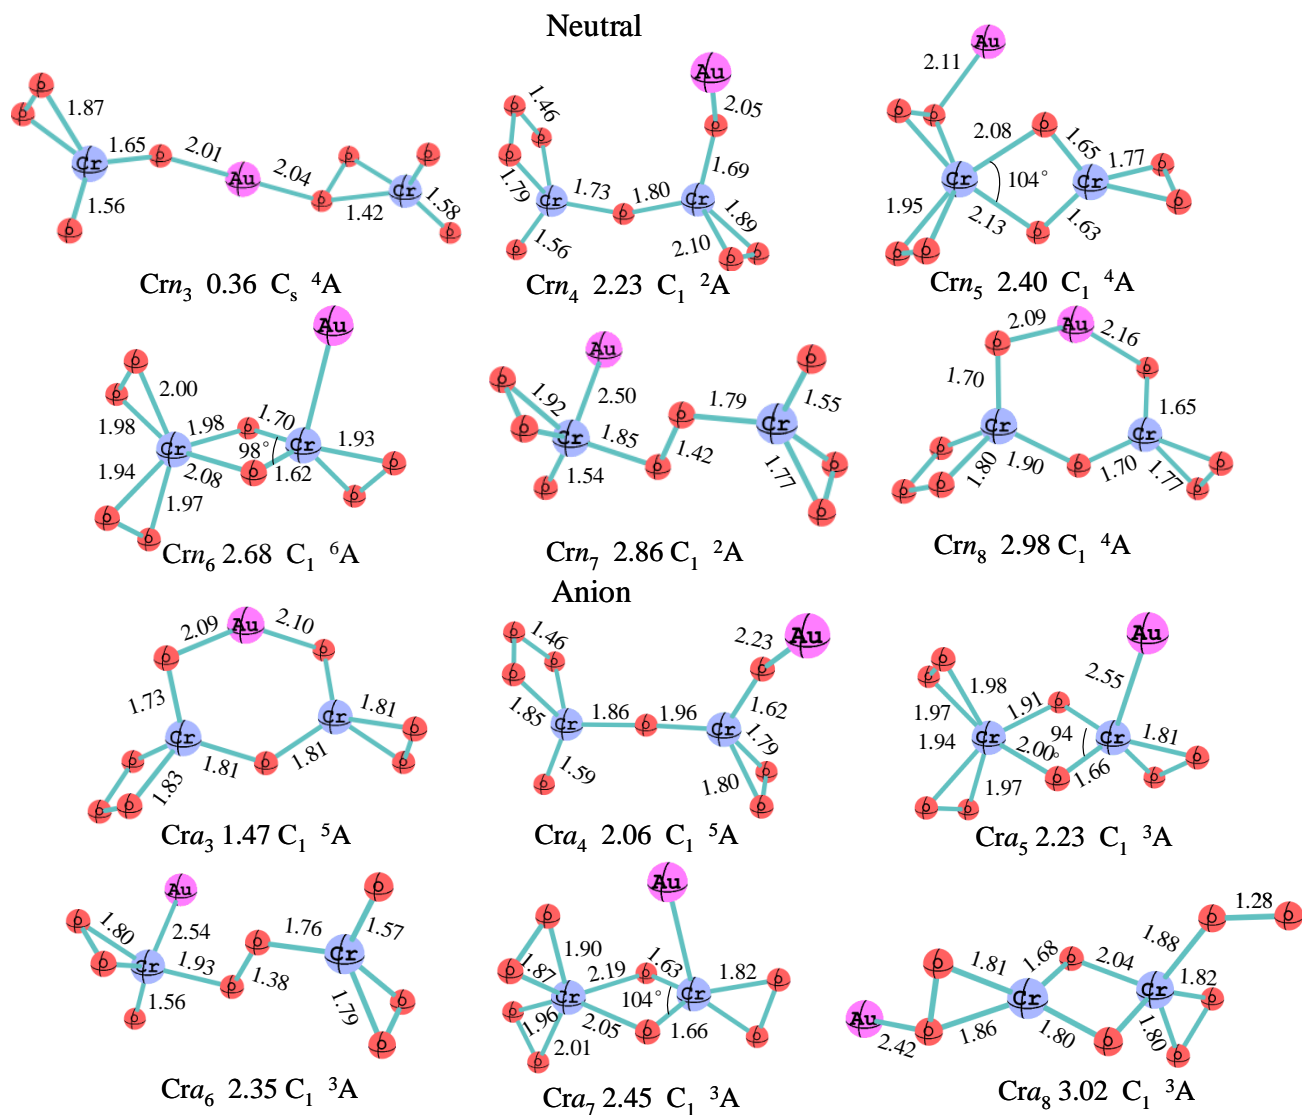

Supplement: c3ra43128b.pdf [file c3ra43128b.pdf]
